# Supplementary material for: High efficiency, low efficiency roll-off and long lifetime fluorescent white organic light-emitting diodes based on strategic management of triplet excitons via triplet–triplet annihilation up-conversion and phosphor sensitization
Source: Royal Society of Chemistry journal article supplement (doi:10.1039/d0tc01622e), 2020-01-01
Supplement: d0tc01622e1.pdf [file d0tc01622e1.pdf]

**High efficiency, low efficiency roll-off and long lifetime fluorescent  
white organic light-emitting diodes based on strategic management  
of triplet excitons via triplet-triplet annihilation up-conversion and  
phosphor sensitization**

Jingwen Yao, Shu Xiao, Shuai Zhang, Qian Sun, Yanfeng Dai, Xianfeng Qiao, Dezhi Yang, Jiangshan Chen and Dongge Ma\*

Institute of Polymer Optoelectronic Materials and Devices, Guangdong Provincial Key Laboratory of Luminescence from Molecular Aggregates, State Key Laboratory of Luminescent Materials and Devices, South China University of Technology, Guangzhou, 510640, China.

E-mail: msdgma@scut.edu.cn

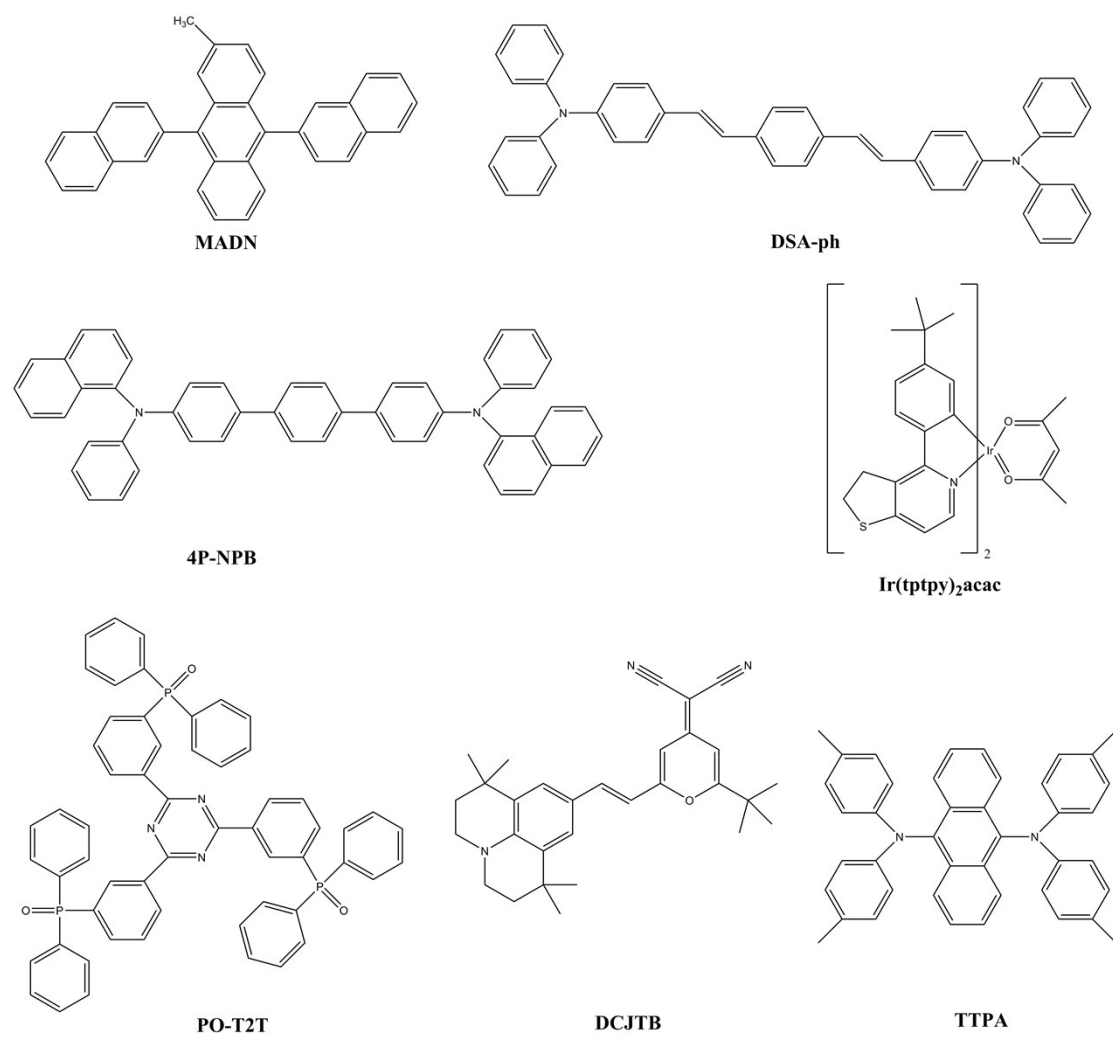

**Fig. S1** Molecular structures of the used materials used in this work.

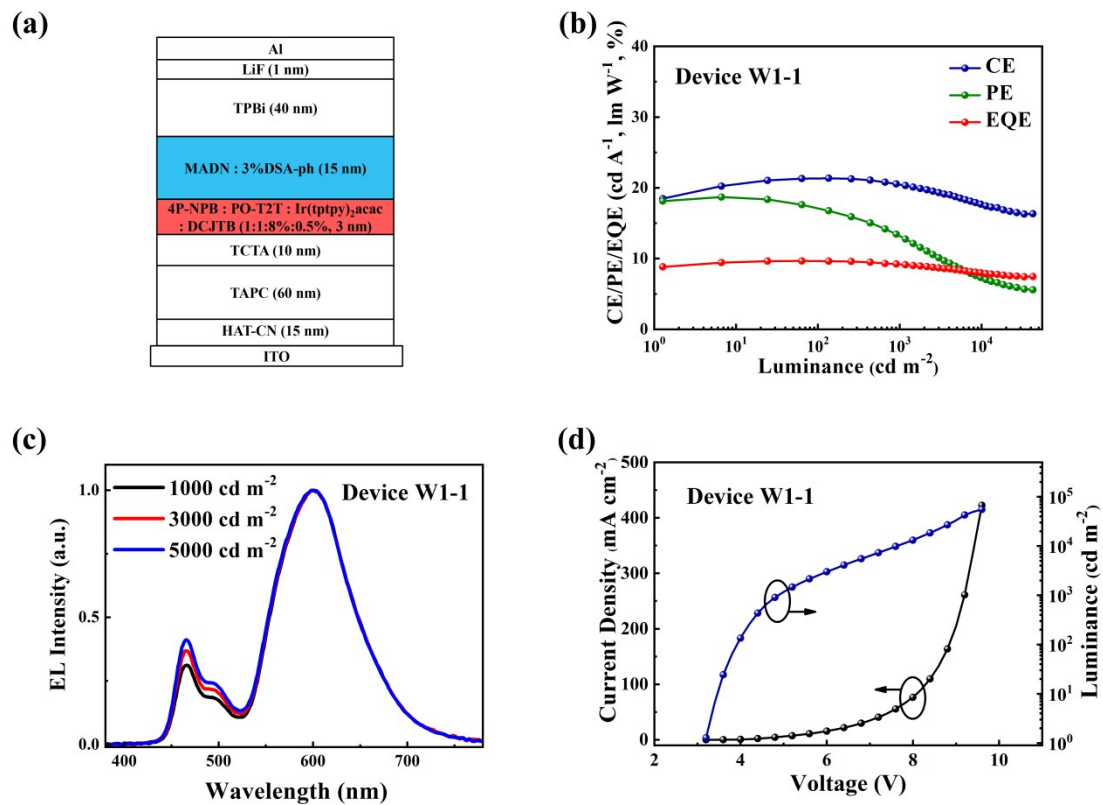

**Fig. S2** Device structure and EL performances of the resulting two-color fluorescent WOLEDs (Device W1-1) without interlayer. (a) Device structure. (b) CE, PE and EQE-luminance characteristics. (c) EL spectra at different luminance. (d) Current density-luminance-voltage (J-L-V) characteristics.

**Table S1** Summary of the EL performances of Devices W1 and W1-1.

| Device | Von <sup>a</sup><br>(V) | Max CE <sup>b</sup><br>[ cd A <sup>-1</sup> ] | Max PE <sup>b</sup><br>[lm W <sup>-1</sup> ] | Max EQE <sup>b</sup><br>[%] | CIE <sup>c</sup><br>(x, y) | Performance at the luminance of 1000/10000 cd m <sup>-2</sup> |                          |           |
|--------|-------------------------|-----------------------------------------------|----------------------------------------------|-----------------------------|----------------------------|---------------------------------------------------------------|--------------------------|-----------|
|        |                         |                                               |                                              |                             |                            | CE [ cd A <sup>-1</sup> ]                                     | PE [lm W <sup>-1</sup> ] | EQE [%]   |
| W1     | 3.4                     | 26.9                                          | 22.3                                         | 12.8                        | (0.51,0.41)                | 25.9/23.1                                                     | 16.9/10.6                | 12.1/10.7 |
| W1-1   | 3.2                     | 21.4                                          | 18.7                                         | 9.7                         | (0.49,0.40)                | 20.3/17.4                                                     | 12.8/7.0                 | 9.1/7.5   |

<sup>a</sup> Turn-on voltage at the luminance of 1 cd m<sup>-2</sup>; <sup>b</sup> Maximum current efficiency, maximum power efficiency, and maximum external quantum efficiency; <sup>c</sup> Commission Internationale de L'Eclairage at the luminance of 1000 cd m<sup>-2</sup>.
